# Supplementary material for: Investigating the Specificity of the Dehydration and Cyclization Reactions in Engineered Lanthipeptides by Synechococcal SyncM
Source: PubMed Central journal article supplement (PMC9872173; doi:10.1021/acssynbio.2c00455), 2022-12-15
Supplement: sb2c00455_si_001.pdf [file sb2c00455_si_001.pdf]

1 Investigating the specificity of the dehydration and cyclization reactions  
2 in engineered lanthipeptides by synechococcal SyncM

3

4 Patricia Arias-Orozco<sup>1</sup>, Yunhai Yi<sup>1</sup>, Fleur Ruijne, Rubén Cebrián<sup>1,2</sup> and Oscar P.  
5 Kuipers<sup>1\*</sup>

6

7 <sup>1</sup>Department of Molecular Genetics, University of Groningen, Groningen, Nijenborgh  
8 7, 9747AG, Groningen, The Netherlands.

9 <sup>2</sup>Department of Clinical Microbiology, Instituto de Investigación Biosanitaria ibs.

10 GRANADA, University Hospital Clínico San Cecilio, Av. De la Innovación s/n, 18016,  
11 Granada, Spain.

12 \*Corresponding author: Oscar P. Kuipers, o.p.kuipers@rug.nl

13

14

15 **Supporting Information for Publication**

16

17 **FIGURES AND TABLES**

18

19

20

A) MALDI-TOF and Ring analysis NEM

■ Control  
■ NEM

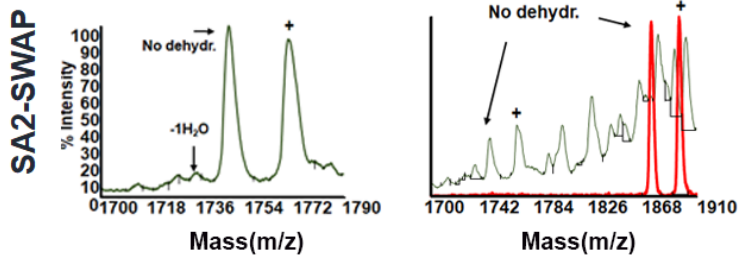

B) LC-MS

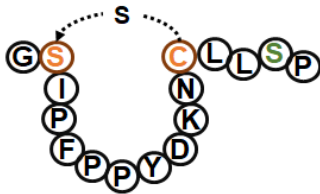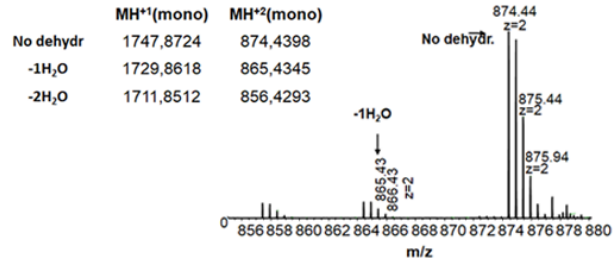

C) No dehy MH+2 874.43

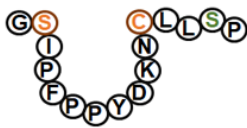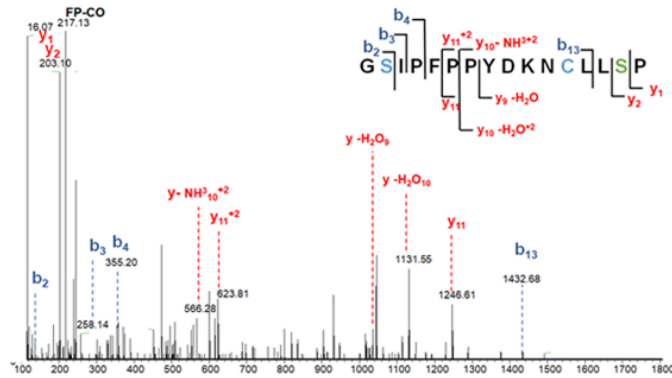

D) -1H<sub>2</sub>O MH+2 865.44

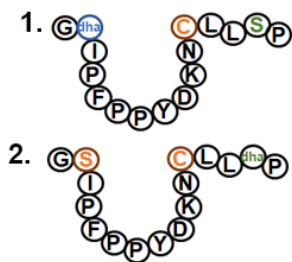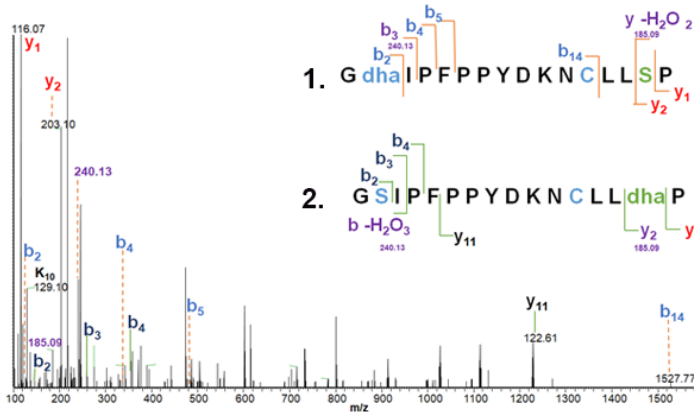

21

22 **Supplementary Figure S1.** Overview of SA2-SWAP of SyncA2 mutants. Dehydration  
 23 and cyclization state analysis. A) MALDI-TOF spectra of SA2-SWAP; the dehydration  
 24 state is depicted by arrows. Ring analysis with N-ethylmaleimide (NEM, red spectra  
 25 correspond after NEM reaction). (+) Na-adduct B) LC-MS spectra. Detected masses

26 were found to correspond to non-dehydrated and -1H<sub>2</sub>O peptides. C) MS<sup>2</sup> spectra of  
27 the non-dehydrated peptide. Ion fragments of the unmodified peptide are indicated. D)  
28 MS<sup>2</sup> spectra of the -1H<sub>2</sub>O peptide. Ion fragments of -1H<sub>2</sub>O unmodified peptide are  
29 indicated. Two options for dehydration were found. Form 1 with the S2 dehydrated.  
30 Form 2 with the S15 dehydrated. Ion fragments of each form are differentiated with  
31 color. (1-Orange, 2-Dark blue, same ion-Red). Masses that could correspond to both  
32 peptides are identified in purple.

33

34

35

A) LC-MS

SA2-+1A

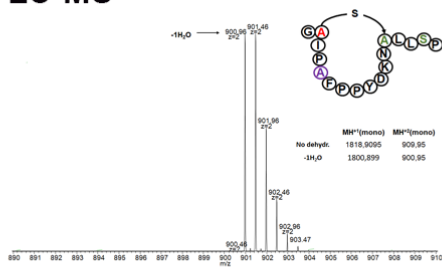

SA2-+2A

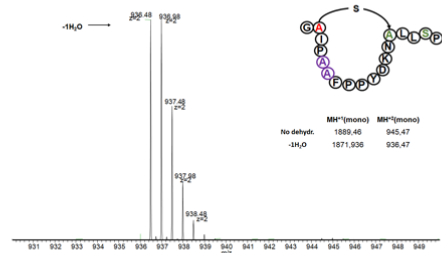

SA2-+3A

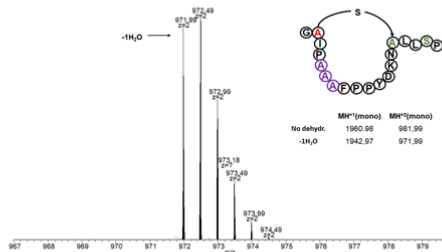

SA2-+4A

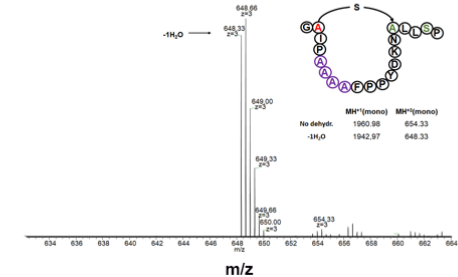

B) MS/MS

SA2-+1A

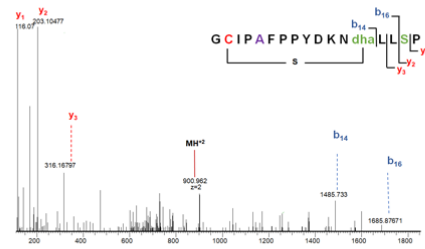

SA2-+2A

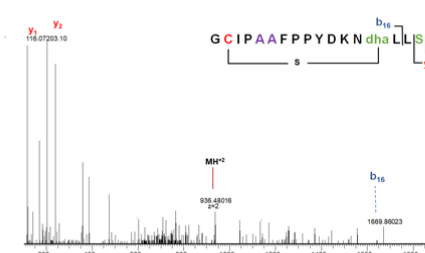

SA2-+3A

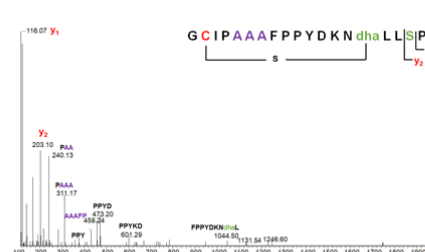

SA2-+4A

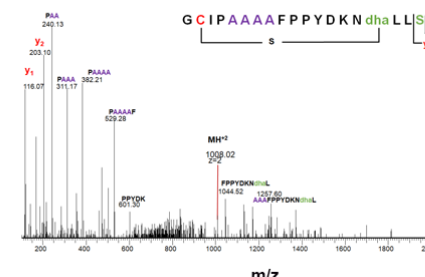

36

37 **Supplementary Figure S2.** LC-MS/MS spectra of SyncA2 macrocycle variants. A)

38 Shows the LC-MS chromatograms. Expected dehydration was found in all mutants.

39 SA2-+1A, SA2-+2A, SA2-+3A and SA2-+4<sup>a</sup>. B) Ring formation analysis showing MS<sup>2</sup>

40 spectra of each macrocycle mutant: SA2-+1A, SA2-+2A, SA2-+3A, and SA2-+4<sup>a</sup>

41 Fragmented ions, corresponding with the two-time mass charge in each mutant, are

42 depicted. A lanthionine ring was installed by SyncM in all variants.

43

44

45

### A) Ring analysis SyncA6

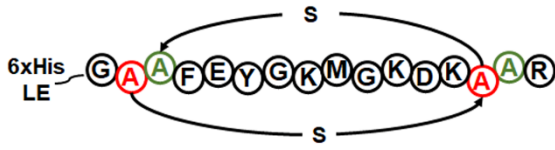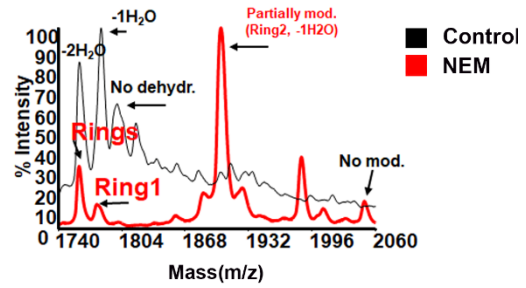

### B) Ring Analysis NEM

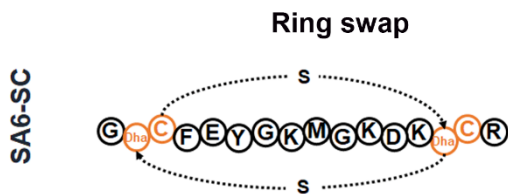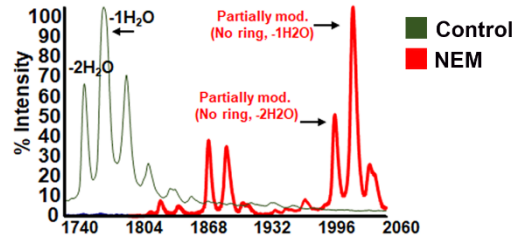

### C) Ring Analysis NEM

#### Ring swap (single-ring)

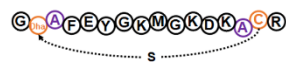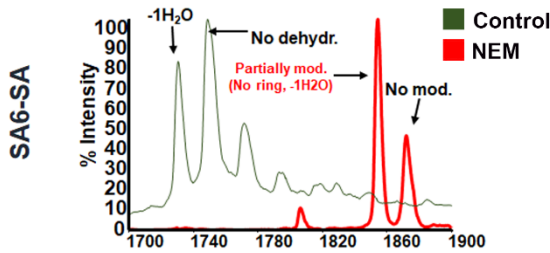

#### Ring original (single-ring)

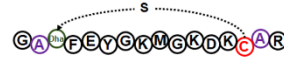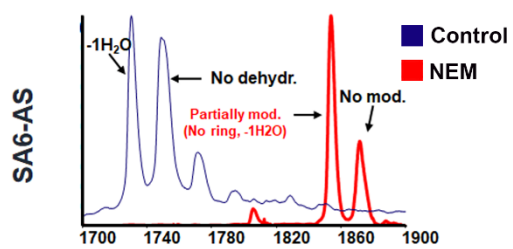

SA6-AC

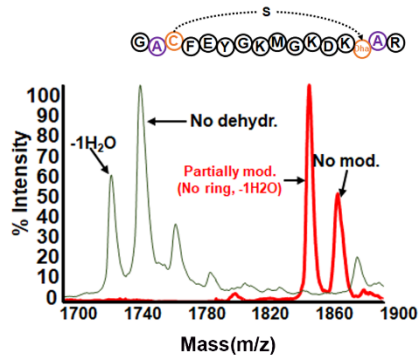

SA6-CA

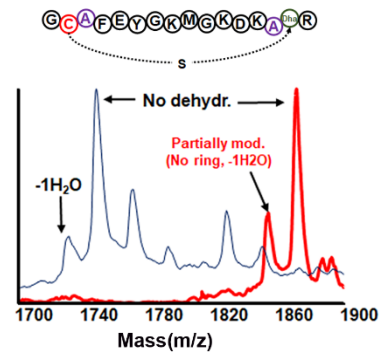

46

47 **Supplementary Figure S3.** Ring analysis of SyncA6 mutants with the NEM reaction.

48 A) SyncA6 control. B) Mutants with a change in the dehydration and ring direction. C)

49 Single-ring mutants. Red lines correspond to spectra after NEM reaction and back line

50 (black, green and blue) depicts control spectra. No ring was formed in any of the  
 51 mutants.

### A) MALDI-TOF non-cyclized

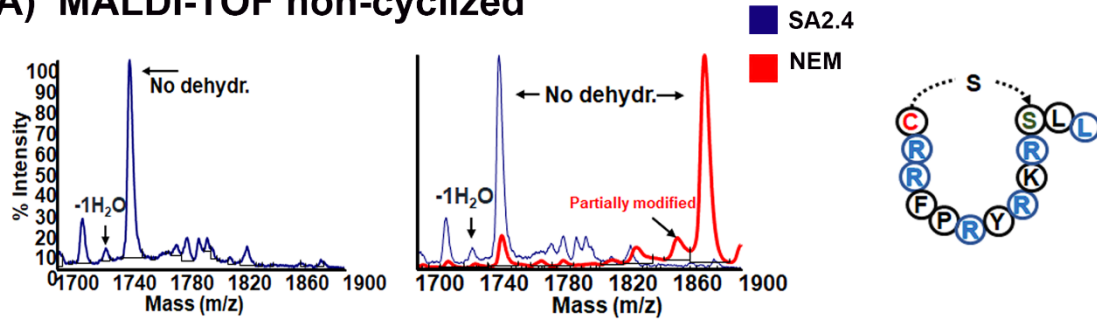

### B) Ring analysis

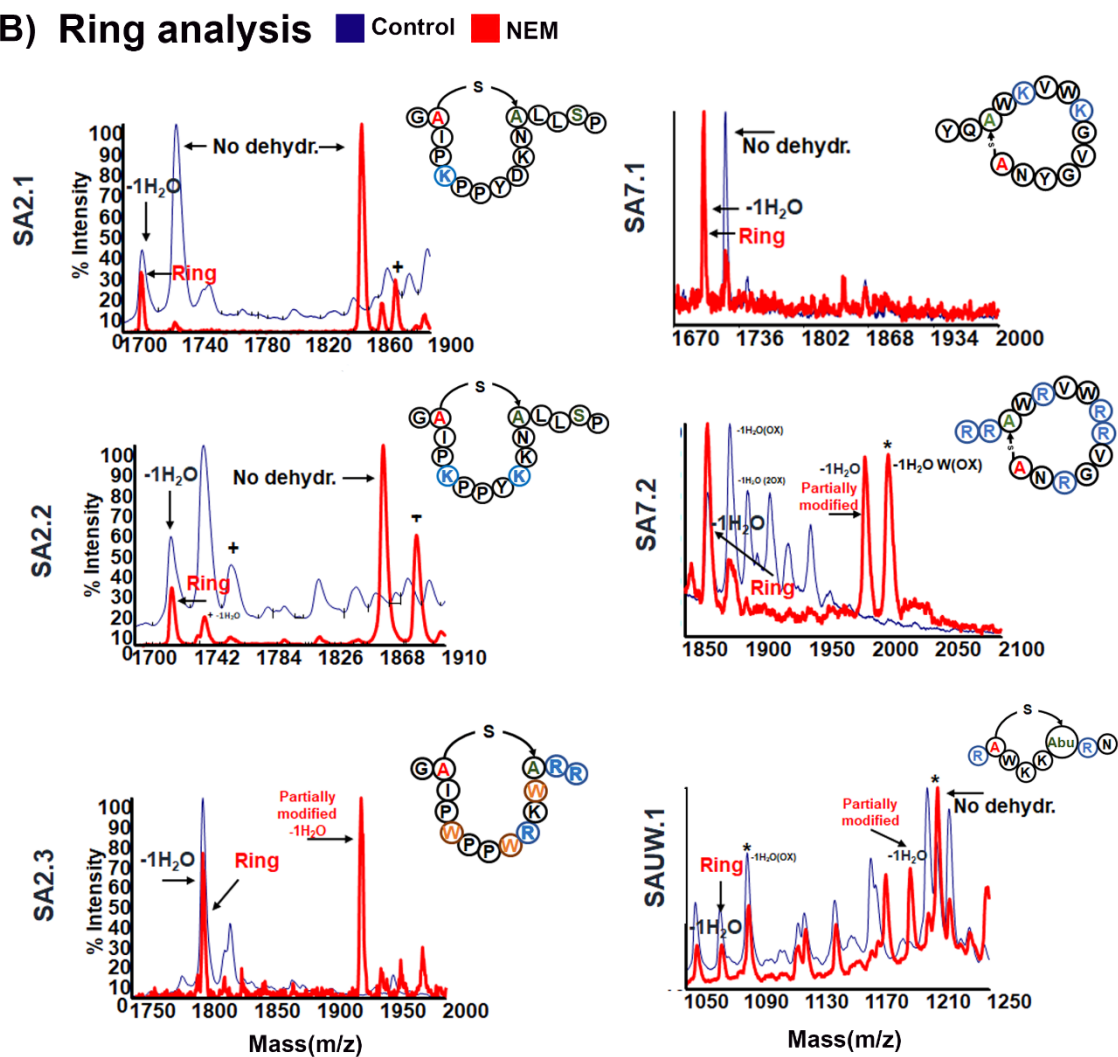

52

53 **Supplementary Figure S4.** Ring analysis of single-ringed engineered SyncA's with  
 54 the NEM reaction. (+) Na adduct . A) The SA2.4 MALDI-TOF dehydration state is

55 depicted by arrows. Ring analysis with N-ethylmaleimide (NEM, red spectra  
 56 correspond to the situation after NEM reaction). B) Single-ring variants with a ring  
 57 installed. SA2.1, SA2.2, SA2.3, SA7.1, SA7.2, SAUW.1.

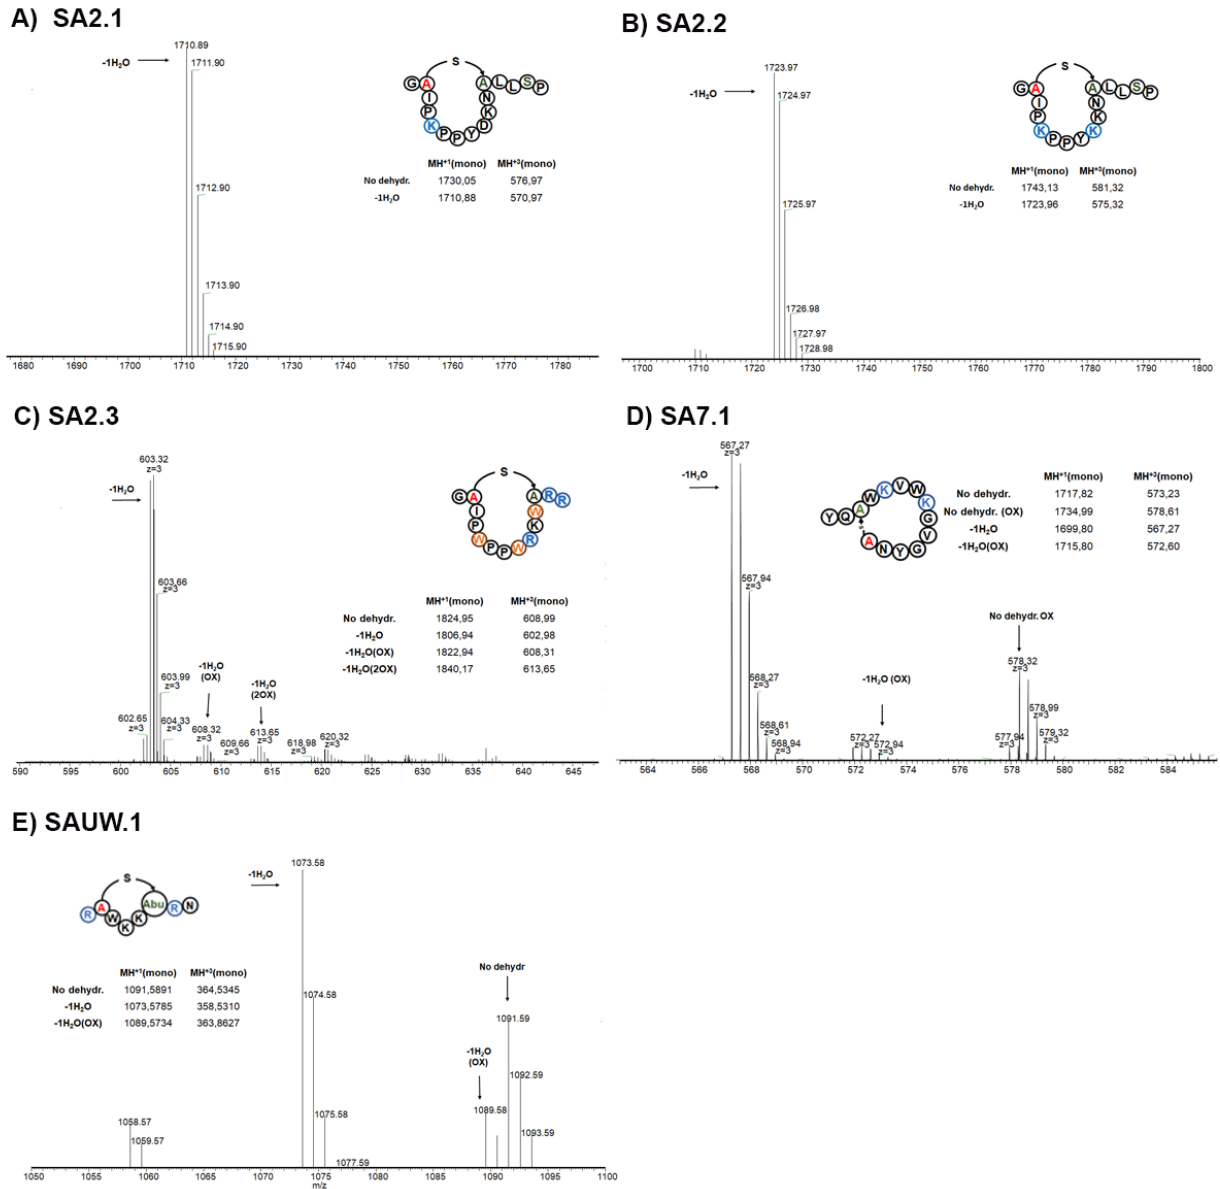

58

59

60 **Supplementary Figure S5.** LC-MS Spectra of SyncA2 engineered single-ringed  
 61 SyncA's. A) SA2.1 B) SA2.2, C) SA2.3, D) SA7.1. E) SAUW.1.

62

63

### A) MALDI-TOF non cyclized cAP

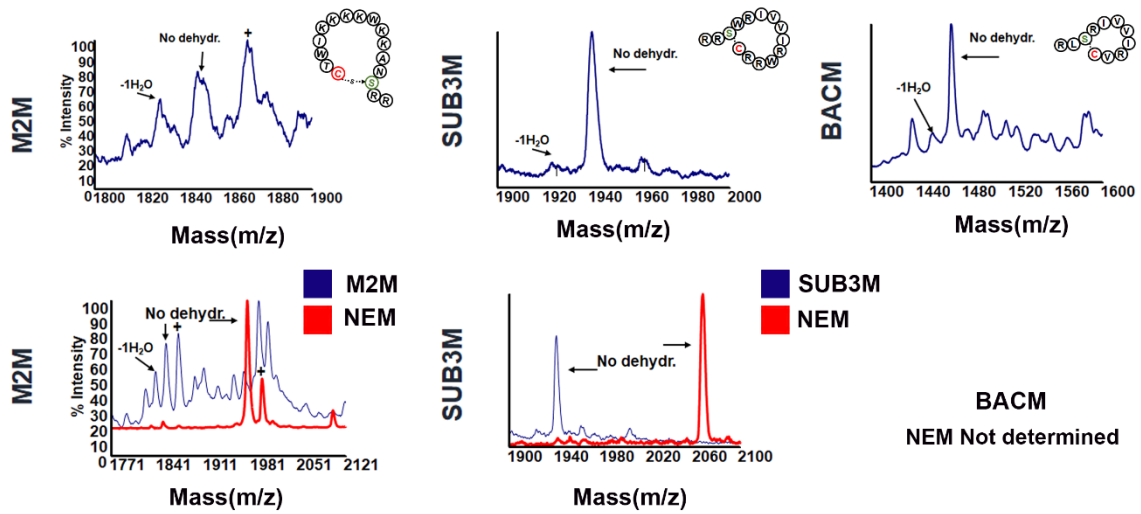

### B) Ring analysis cyclized cAP

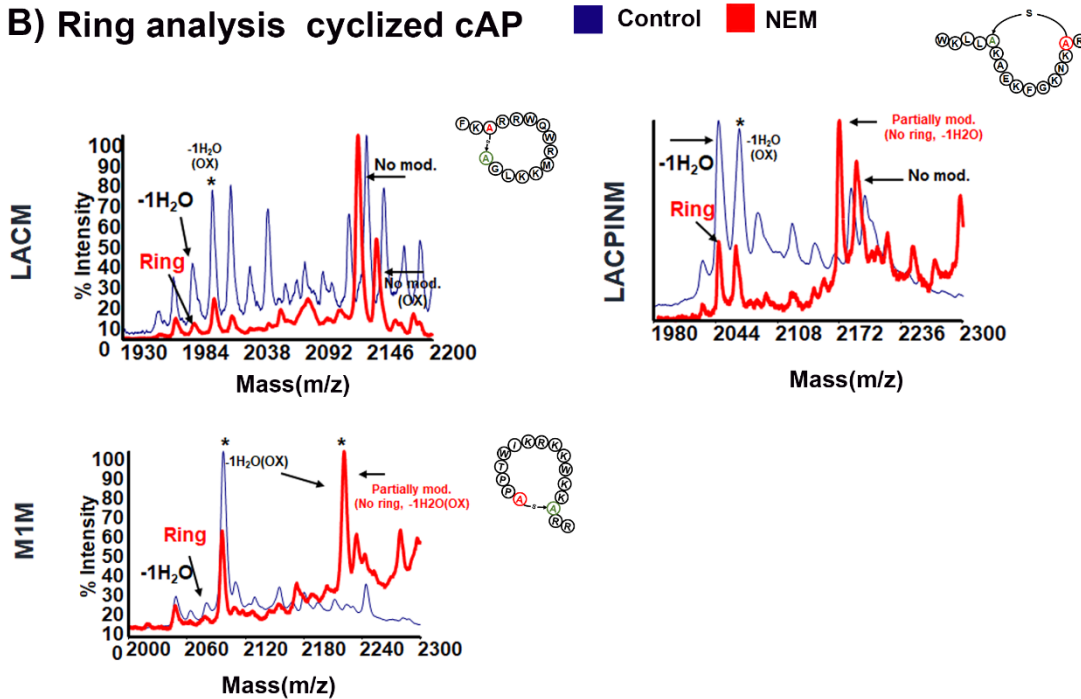

65

66 **Supplementary Figure S6.** Ring analysis of non-prochlorosin peptides co-expressed

67 with SyncM. A) MALDI-TOF and NEM of non-modified AMPs B) Ring analysis of cAMP

68 with NEM. LACM, M1M, and LACPINM.

69



A) LANM

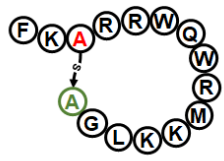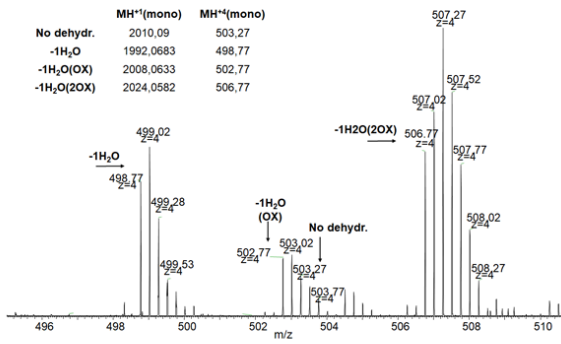

B) LACPINM

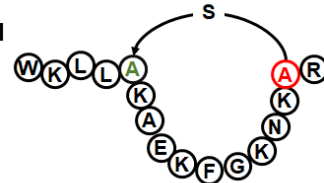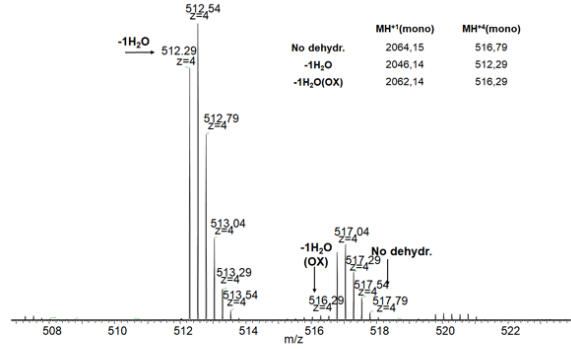

C) M1M

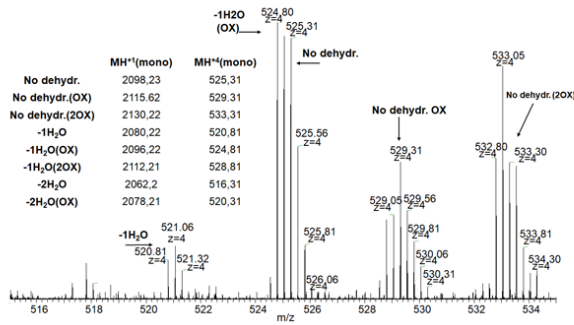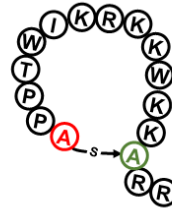

70

71 **Supplementary Figure S7** LC-MS analysis of non-prochlorosin peptides co-  
 72 expressed with SyncM A) LACTO\_+S15, B) LACPIN\_S16C- and C) SyncAUW.1.

73

74

**A) Murepavadin**

cyclo[Ala-Ser-D-Pro-Pro-Thr-Trp-Ile-Dab-Orn-D-Dab-Dab-Trp-Dab-Dab]

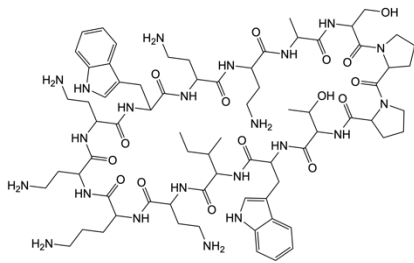

**B) M1M** **C** **P** **T** **W** **I** **K** **R** **K** **K** **W** **K** **R** **S** **R**

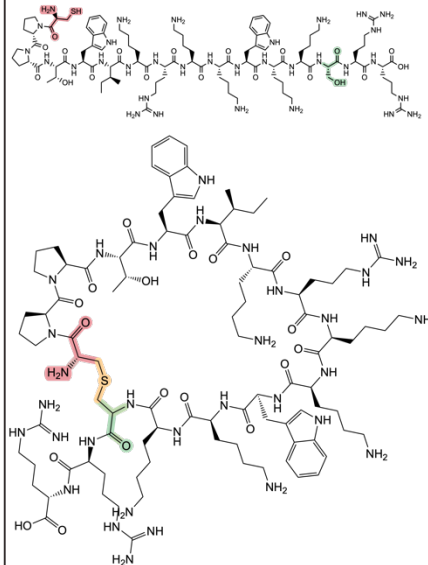

**C) M2M** **C** **T** **W** **I** **K** **K** **K** **R** **W** **L** **L** **A** **N** **S** **V**

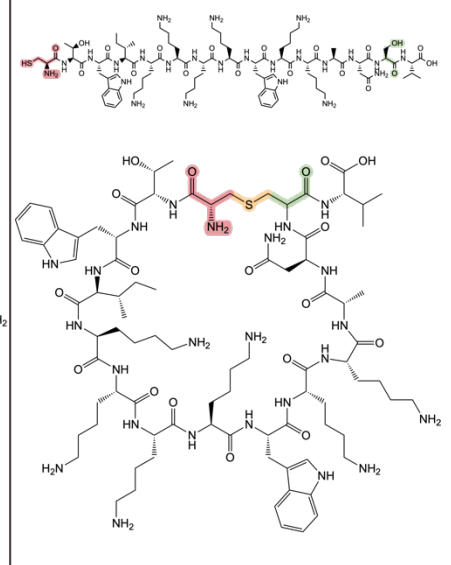

75

76 **Supplementary figure S8. Chemical structure of Murepavadin<sup>1</sup> and proposed**  
 77 **chemical structure of M1M and M2M with the lanthionine ring. A) Murepavadin**  
 78 **sequence and known structure; B) M1M amino acid sequence, linear chemical**  
 79 **structure Cys (Highlighted in Red) and Ser (Highlighted in green) and macrocyclic**  
 80 **structure after SyncM (lanthionine ring in yellow); C) M1M amino acid sequence, linear**  
 81 **chemical structure Cys (Highlighted in Red) and Ser (Highlighted in green) and**  
 82 **macrocyclic structure after SyncM (lanthionine ring in yellow).**

83 **Supplementary Table S1.** Core peptide sequences and amino acid profiles of 79 SyncA's from *Synechococcus* M19509. Residues  
 84 involved in ring formation are highlighted in selected peptides (red for (C) and green for (T/S)). Blue numbers highest occurrence and  
 85 red numbers lowest occurrence.

86

| #   | Core Peptide Sequence                                                                                            | AA <sup>a</sup> | Ala | Ile | Val | Leu | Met | Phe | Trp | Tyr | Pro | Gly | Cys | Ser | Thr | Asn | Gln | Arg | Lys | His | Asp | Glu | CHARGE |
|-----|------------------------------------------------------------------------------------------------------------------|-----------------|-----|-----|-----|-----|-----|-----|-----|-----|-----|-----|-----|-----|-----|-----|-----|-----|-----|-----|-----|-----|--------|
| 1   | TIPPVNWIG<br>EKMDKGC<br>GTLFAASYT<br>SCVAMGTAN<br>KECG                                                           | 40              | 5   | 3   | 2   | 1   | 2   | 1   | 1   | 1   | 2   | 5   | 3   | 2   | 4   | 2   | 0   | 0   | 3   | 0   | 1   | 2   | 0      |
| SA1 | AGSANPQG<br>GDPWCTWD<br>FPICINHK                                                                                 | 24              | 2   | 2   | 0   | 0   | 0   | 1   | 2   | 0   | 3   | 3   | 2   | 1   | 1   | 2   | 1   | 0   | 1   | 1   | 2   | 0   | 1      |
| SA2 | GCIFFPPYD<br>KNSLLSP                                                                                             | 16              | 0   | 1   | 0   | 2   | 0   | 1   | 0   | 1   | 4   | 1   | 1   | 2   | 0   | 1   | 0   | 0   | 1   | 0   | 1   | 0   | 0      |
| 4   | RRCDSGIW<br>GWIGMAKTC<br>KGPTQG<br>IPGVATTPQL<br>THVLSNLTS<br>QNPdffngf<br>DFFSSLTNPI                            | 24              | 1   | 2   | 0   | 0   | 1   | 0   | 2   | 0   | 1   | 5   | 3   | 1   | 2   | 0   | 1   | 2   | 2   | 0   | 1   | 0   | 3      |
| 5   | DKPPIPGTIE<br>RINYLLKTLQ<br>DIVAITVKDS<br>QYPYQKSTS<br>TLSCFAIDGR<br>QQLTSRKSC<br>GDCVLGRAL<br>SCLLLGSYA<br>KQKR | 96              | 3   | 8   | 4   | 9   | 0   | 6   | 0   | 3   | 8   | 4   | 2   | 10  | 11  | 5   | 7   | 3   | 5   | 1   | 6   | 1   | 1      |
| 6   | TNILNSAGFC<br>NDNPESRSL<br>QP                                                                                    | 22              | 2   | 0   | 1   | 5   | 0   | 0   | 0   | 1   | 0   | 3   | 2   | 2   | 0   | 0   | 1   | 2   | 2   | 0   | 1   | 0   | 3      |
| 7   | EYECLCHCT<br>WDDVTSCTY<br>NTWGLG                                                                                 | 21              | 1   | 1   | 0   | 2   | 0   | 1   | 0   | 0   | 2   | 1   | 1   | 3   | 1   | 4   | 1   | 1   | 0   | 0   | 1   | 1   | -1     |
| 8   |                                                                                                                  | 0               | 0   | 0   | 2   | 2   | 0   | 0   | 2   | 1   | 0   | 2   | 0   | 0   | 0   | 0   | 0   | 0   | 0   | 0   | 0   | 0   | -4     |

|      |                                                 |    |   |   |   |   |   |   |   |   |   |   |   |   |   |   |   |   |   |   |   |   |    |
|------|-------------------------------------------------|----|---|---|---|---|---|---|---|---|---|---|---|---|---|---|---|---|---|---|---|---|----|
| 9    | GACPSTFTID<br>ACAATGCNP<br>KDL                  | 22 | 4 | 1 | 0 | 1 | 0 | 1 | 0 | 0 | 2 | 2 | 3 | 1 | 3 | 1 | 0 | 0 | 1 | 0 | 2 | 0 | -1 |
| 10   | AASAIVGDC<br>QSQEGHVCF<br>SEGEVCGK<br>R         | 28 | 3 | 1 | 4 | 0 | 0 | 1 | 0 | 0 | 0 | 4 | 3 | 3 | 0 | 0 | 2 | 1 | 1 | 1 | 1 | 3 | -2 |
| 11   | TAWNSNCY                                        | 8  | 1 | 0 | 0 | 0 | 0 | 0 | 1 | 1 | 0 | 0 | 1 | 2 | 1 | 1 | 0 | 0 | 0 | 0 | 0 | 0 | 0  |
| 12   | CDIELVSLCS<br>KTHNVLC                           | 17 | 0 | 1 | 2 | 3 | 0 | 0 | 0 | 0 | 0 | 0 | 3 | 2 | 1 | 1 | 0 | 0 | 1 | 1 | 1 | 1 | -1 |
| 13   | GLSIWGCTE<br>CVDGTFHCK<br>RCDLSNLF              | 26 | 0 | 1 | 1 | 3 | 0 | 2 | 1 | 0 | 0 | 3 | 4 | 2 | 2 | 1 | 0 | 1 | 1 | 1 | 2 | 1 | -1 |
| 14   | NSWGWCRG<br>FTGLEGCSA<br>WCNRFCHG<br>RQTR       | 29 | 1 | 0 | 0 | 1 | 0 | 2 | 3 | 0 | 0 | 5 | 4 | 2 | 2 | 2 | 1 | 4 | 0 | 1 | 0 | 1 | 3  |
| 15   | EYTGNDTGP<br>TNMYGVCHI<br>PKCPEWAAS<br>KG       | 29 | 2 | 1 | 1 | 0 | 1 | 0 | 1 | 2 | 3 | 4 | 2 | 1 | 3 | 2 | 0 | 0 | 2 | 1 | 1 | 2 | -1 |
| 16   | SGWAGYKP<br>GQACLGVDT<br>MAPPSPGEF<br>YLSYDGSER | 26 | 3 | 0 | 1 | 1 | 1 | 1 | 1 | 1 | 4 | 5 | 1 | 2 | 1 | 0 | 1 | 0 | 1 | 0 | 1 | 1 | -1 |
| SA9  | TFGCGGKGC<br>GWVEPPTKI<br>GGGECRDN<br>KLR       | 38 | 0 | 1 | 1 | 2 | 0 | 1 | 1 | 2 | 2 | 9 | 3 | 2 | 2 | 1 | 0 | 3 | 3 | 0 | 2 | 3 | 1  |
| 18   | GVRGGTAAY<br>MCPTDRNKT<br>CKPVATCPG<br>LK       | 21 | 3 | 0 | 2 | 1 | 1 | 0 | 0 | 1 | 3 | 4 | 1 | 1 | 0 | 0 | 0 | 0 | 0 | 0 | 0 | 0 | 4  |
| 19   | AEGGWQCQL<br>FPVPTACQV<br>TWN                   | 20 | 2 | 0 | 2 | 1 | 0 | 1 | 2 | 0 | 2 | 2 | 2 | 0 | 2 | 1 | 2 | 0 | 0 | 0 | 0 | 1 | -1 |
| 20   | DSGGDYLSY<br>AGCDTGRCC<br>ACSWGCPG              | 26 | 2 | 0 | 0 | 1 | 0 | 0 | 1 | 2 | 1 | 7 | 4 | 3 | 1 | 0 | 0 | 1 | 0 | 0 | 3 | 0 | -2 |
| 21   | LDALKQCNF<br>TGTCWDTLL                          | 18 | 1 | 0 | 0 | 4 | 0 | 1 | 1 | 0 | 0 | 1 | 2 | 0 | 3 | 1 | 1 | 0 | 1 | 0 | 2 | 0 | -1 |
| SA18 | SDTNWITEV<br>SKCPWWRR<br>S                      | 18 | 0 | 1 | 1 | 0 | 0 | 0 | 3 | 0 | 1 | 0 | 1 | 3 | 2 | 1 | 0 | 2 | 1 | 0 | 1 | 1 | 1  |
| SA13 | CWMNTCWG<br>YGPGTAAAP<br>DWN                    | 20 | 3 | 0 | 0 | 0 | 1 | 0 | 3 | 1 | 2 | 3 | 2 | 0 | 2 | 2 | 0 | 0 | 0 | 0 | 1 | 0 | -1 |

|      |                                                 |    |   |   |   |   |   |   |   |   |   |   |   |   |   |   |   |   |   |   |   |   |   |    |
|------|-------------------------------------------------|----|---|---|---|---|---|---|---|---|---|---|---|---|---|---|---|---|---|---|---|---|---|----|
| SA14 | TDNALNKCT<br>TGCSPSGEV<br>PGYTKPCDN<br>All      | 30 | 2 | 2 | 1 | 1 | 0 | 0 | 0 | 0 | 1 | 3 | 3 | 3 | 2 | 4 | 3 | 0 | 0 | 2 | 0 | 2 | 1 | -1 |
| 25   | ANICTGCQIA<br>TTCIDDSQIL<br>QYTNSG              | 26 | 2 | 4 | 0 | 1 | 0 | 0 | 0 | 0 | 1 | 0 | 2 | 3 | 2 | 4 | 2 | 3 | 0 | 0 | 0 | 2 | 0 | -2 |
| 26   | GACEVLTGP<br>VIESYVGDS<br>WHDYCCRIT             | 27 | 1 | 2 | 3 | 1 | 0 | 0 | 1 | 2 | 1 | 3 | 3 | 3 | 2 | 2 | 0 | 0 | 1 | 0 | 1 | 2 | 2 | -3 |
| SA4  | EGSWRAGW<br>GPCRVRLSM<br>SPQHKNCRG<br>EQCPLNTGC | 26 | 1 | 0 | 1 | 1 | 1 | 0 | 2 | 0 | 2 | 4 | 2 | 2 | 3 | 0 | 1 | 1 | 4 | 1 | 1 | 0 | 1 | 4  |
| SA5  | PLHTGWWC<br>TGVLVDQQP<br>HRSAASNI               | 40 | 2 | 1 | 2 | 3 | 0 | 0 | 2 | 0 | 3 | 3 | 3 | 3 | 2 | 4 | 2 | 0 | 0 | 3 | 0 | 1 | 2 | -1 |
| SA8  | SDDELTDF<br>GCKDYERY<br>NKSHYYCEP               | 17 | 0 | 0 | 0 | 1 | 0 | 1 | 0 | 2 | 0 | 1 | 1 | 1 | 1 | 2 | 0 | 0 | 1 | 1 | 0 | 4 | 2 | -4 |
| SA3  | IPAPFA                                          | 15 | 2 | 1 | 0 | 0 | 0 | 1 | 0 | 2 | 3 | 0 | 1 | 1 | 0 | 1 | 0 | 0 | 1 | 1 | 0 | 1 | 0 | 0  |
| 31   | EPTPWDPE<br>WYN                                 | 11 | 0 | 0 | 0 | 0 | 0 | 0 | 2 | 1 | 3 | 0 | 0 | 0 | 0 | 1 | 1 | 0 | 0 | 0 | 0 | 1 | 2 | -3 |
| 32   | ECGNVSCVN<br>IYLLTLGKDK<br>EVEL                 | 23 | 0 | 1 | 3 | 4 | 0 | 0 | 0 | 1 | 0 | 2 | 2 | 2 | 1 | 1 | 2 | 0 | 0 | 2 | 0 | 1 | 3 | -2 |
| 33   | KVSDFC <del>TSDI</del><br>VSYCCW                | 16 | 0 | 1 | 2 | 0 | 0 | 1 | 1 | 1 | 0 | 0 | 3 | 3 | 3 | 1 | 0 | 0 | 0 | 1 | 0 | 2 | 0 | -1 |
| 34   | ASWSGPMW<br>NTTCIGG                             | 15 | 1 | 1 | 0 | 0 | 1 | 0 | 2 | 0 | 1 | 3 | 1 | 2 | 2 | 2 | 1 | 0 | 0 | 0 | 0 | 0 | 0 | 0  |
| 35   | DYCTVETAT<br>VCYIREPGC<br>DTSYGC                | 25 | 1 | 1 | 2 | 0 | 0 | 0 | 0 | 3 | 1 | 2 | 4 | 4 | 1 | 4 | 0 | 0 | 1 | 0 | 0 | 3 | 2 | -4 |
| 36   | RSYNWASW<br>CSE                                 | 11 | 1 | 0 | 0 | 0 | 0 | 0 | 2 | 1 | 0 | 0 | 1 | 3 | 0 | 0 | 1 | 0 | 1 | 0 | 0 | 0 | 1 | 0  |
| SA12 | YYCACTRIPV<br>YNHTN                             | 15 | 1 | 1 | 1 | 0 | 0 | 0 | 0 | 3 | 1 | 0 | 2 | 0 | 2 | 2 | 0 | 1 | 0 | 1 | 0 | 0 | 0 | 1  |
| 38   | GTGRHTCGT<br>GSCGCFCSI<br>YEC                   | 24 | 0 | 1 | 0 | 0 | 0 | 1 | 0 | 1 | 0 | 5 | 2 | 2 | 1 | 1 | 2 | 1 | 0 | 1 | 1 | 2 | 0 | 0  |
| 39   | ICRQSCIWRS<br>IFKAAPE                           | 17 | 2 | 3 | 0 | 0 | 0 | 1 | 1 | 0 | 1 | 0 | 2 | 2 | 0 | 0 | 0 | 1 | 2 | 1 | 0 | 0 | 1 | 2  |
| 4    | VGGVCGAFT<br>SEANGTP                            | 16 | 2 | 0 | 2 | 0 | 0 | 1 | 0 | 0 | 1 | 4 | 1 | 1 | 2 | 2 | 1 | 0 | 0 | 0 | 0 | 0 | 1 | -1 |
| 41   | GTDVNHCFY<br>ATAYGPHTC<br>SGACAK                | 24 | 4 | 0 | 1 | 0 | 0 | 1 | 0 | 2 | 1 | 3 | 3 | 3 | 1 | 3 | 1 | 0 | 0 | 1 | 2 | 1 | 0 | 0  |
| 42   | TACALRVGT<br>VFIGSCWN                           | 17 | 2 | 1 | 2 | 1 | 0 | 1 | 1 | 0 | 0 | 2 | 2 | 2 | 1 | 2 | 1 | 0 | 1 | 0 | 0 | 0 | 0 | 1  |

|      |                                       |    |   |   |   |   |   |   |   |   |   |   |   |   |   |   |   |   |   |   |   |   |    |
|------|---------------------------------------|----|---|---|---|---|---|---|---|---|---|---|---|---|---|---|---|---|---|---|---|---|----|
| 43   | DLHSVCGFS<br>ACGTCGLEG<br>TCLICEDT    | 26 | 1 | 1 | 1 | 3 | 0 | 1 | 0 | 0 | 0 | 4 | 5 | 2 | 3 | 0 | 0 | 0 | 0 | 1 | 2 | 2 | -4 |
| 44   | LAWGAGGS<br>RVPIN                     | 13 | 2 | 1 | 1 | 1 | 0 | 0 | 1 | 0 | 1 | 3 | 0 | 1 | 0 | 1 | 0 | 1 | 0 | 0 | 0 | 0 | 1  |
| 45   | ANQSFEYGA<br>IGQCLPPCP<br>MSH         | 21 | 2 | 1 | 0 | 1 | 1 | 1 | 0 | 1 | 3 | 2 | 2 | 2 | 0 | 1 | 2 | 0 | 0 | 1 | 0 | 1 | -1 |
| 46   | ANSCDILTAJ<br>VWDSYMG<br>CFICNKH      | 25 | 2 | 3 | 1 | 1 | 1 | 1 | 1 | 1 | 0 | 1 | 3 | 2 | 2 | 2 | 0 | 0 | 1 | 1 | 2 | 0 | -1 |
| 47   | SETNCGYPT<br>KFCMVCA<br>EHRVVTQC<br>Q | 28 | 1 | 0 | 3 | 0 | 1 | 1 | 0 | 2 | 1 | 1 | 5 | 1 | 4 | 1 | 2 | 1 | 1 | 1 | 0 | 2 | 0  |
| 48   | GHCLTNSPL<br>AGGCTGWL<br>RI           | 16 | 1 | 1 | 0 | 3 | 0 | 0 | 1 | 0 | 1 | 4 | 1 | 2 | 0 | 1 | 0 | 0 | 1 | 0 | 1 | 0 | 1  |
| 49   | NSDNKHCYY<br>YTSGIYTRCD<br>D          | 20 | 0 | 1 | 0 | 0 | 0 | 0 | 0 | 4 | 0 | 1 | 2 | 2 | 2 | 2 | 0 | 1 | 1 | 1 | 3 | 0 | -1 |
| 5    | DITWDFVSTL<br>VTACADR<br>HCCKK        | 24 | 2 | 1 | 2 | 1 | 1 | 1 | 1 | 0 | 0 | 0 | 3 | 1 | 4 | 0 | 0 | 1 | 2 | 1 | 3 | 0 | 0  |
| 51   | ALQSTIQSEN<br>CTFRGAN<br>CQL          | 20 | 2 | 1 | 0 | 2 | 0 | 1 | 0 | 0 | 0 | 1 | 2 | 2 | 2 | 2 | 3 | 1 | 0 | 0 | 0 | 1 | 0  |
| 52   | KDGTCTKCV<br>TECKGRYC                 | 17 | 0 | 0 | 1 | 0 | 0 | 0 | 0 | 1 | 0 | 2 | 4 | 0 | 3 | 0 | 0 | 1 | 3 | 0 | 1 | 1 | 2  |
| 53   | KKPKLEYSN<br>TSLACGC                  | 16 | 1 | 0 | 0 | 2 | 0 | 0 | 0 | 1 | 1 | 1 | 2 | 2 | 1 | 1 | 0 | 0 | 3 | 0 | 0 | 1 | 2  |
| SA15 | VTLKYKNWC<br>YCTAL                    | 14 | 1 | 0 | 1 | 2 | 0 | 0 | 1 | 2 | 0 | 0 | 2 | 0 | 2 | 1 | 0 | 0 | 2 | 0 | 0 | 0 | 2  |
| 55   | RGFSYLPQE<br>CVTDYLCG                 | 17 | 0 | 0 | 1 | 2 | 0 | 1 | 0 | 2 | 1 | 2 | 2 | 1 | 1 | 0 | 1 | 1 | 0 | 0 | 1 | 1 | -1 |
| SA6  | GCSFEYGKM<br>GKDKCSR                  | 16 | 0 | 0 | 0 | 0 | 1 | 1 | 0 | 1 | 0 | 3 | 2 | 2 | 0 | 0 | 0 | 1 | 3 | 0 | 1 | 1 | 2  |
| SA16 | RIVCVSFGSL<br>FIRRGKLS                | 18 | 0 | 2 | 2 | 2 | 0 | 2 | 0 | 0 | 0 | 2 | 1 | 3 | 0 | 0 | 0 | 3 | 1 | 0 | 0 | 0 | 4  |
| SA11 | CDIELVSLCS<br>KTHNVLC                 | 24 | 0 | 1 | 2 | 3 | 0 | 0 | 0 | 0 | 0 | 0 | 3 | 1 | 2 | 0 | 1 | 2 | 2 | 0 | 1 | 0 | -1 |
| 59   | CYNWKSAR<br>DY                        | 10 | 1 | 0 | 0 | 0 | 0 | 0 | 1 | 2 | 0 | 0 | 1 | 1 | 0 | 1 | 0 | 1 | 1 | 0 | 1 | 0 | 1  |
| 6    | FECSPCKL<br>SIGGPG                    | 15 | 0 | 1 | 0 | 1 | 0 | 2 | 0 | 0 | 2 | 3 | 2 | 2 | 0 | 0 | 0 | 0 | 1 | 0 | 0 | 1 | 0  |
| 61   | LGPKVSAGS<br>LYCLCPG                  | 16 | 1 | 0 | 1 | 3 | 0 | 0 | 0 | 1 | 2 | 3 | 2 | 2 | 0 | 0 | 0 | 0 | 1 | 0 | 0 | 0 | 1  |
| 62   | TCFCFSVAC<br>RLDTGITFR                | 18 | 1 | 1 | 1 | 1 | 0 | 3 | 0 | 0 | 0 | 1 | 3 | 1 | 3 | 0 | 0 | 2 | 0 | 0 | 1 | 0 | 1  |

|     |                                                                               |                  |            |           |           |           |           |           |           |           |           |            |            |            |            |           |           |           |           |           |           |           |                                 |
|-----|-------------------------------------------------------------------------------|------------------|------------|-----------|-----------|-----------|-----------|-----------|-----------|-----------|-----------|------------|------------|------------|------------|-----------|-----------|-----------|-----------|-----------|-----------|-----------|---------------------------------|
| 63  | WRCSVGPQ<br>TNKQNWTA<br>LCCQKGQI                                              | 25               | 1          | 1         | 1         | 1         | 0         | 0         | 2         | 0         | 1         | 2          | 3          | 1          | 2          | 2         | 5         | 1         | 2         | 0         | 0         | 0         | 3                               |
| SA7 | YQSWDVWD<br>GVGYNC                                                            | 14               | 0          | 0         | 2         | 0         | 0         | 0         | 2         | 2         | 0         | 2          | 1          | 1          | 0          | 1         | 1         | 0         | 0         | 0         | 2         | 0         | -2                              |
| 65  | ADTLCCPVR<br>CGQTFSCIA                                                        | 18               | 2          | 1         | 1         | 1         | 0         | 1         | 0         | 0         | 1         | 1          | 4          | 1          | 2          | 0         | 1         | 1         | 0         | 0         | 1         | 0         | 0                               |
| 66  | GAETACLTN<br>NTCFEAQAC<br>CYFTL                                               | 23               | 4          | 0         | 0         | 2         | 0         | 2         | 0         | 1         | 0         | 1          | 4          | 0          | 4          | 2         | 1         | 0         | 0         | 0         | 0         | 2         | -2                              |
| 67  | KDYVGRILT<br>QGKCGC                                                           | 15               | 0          | 0         | 1         | 1         | 0         | 0         | 0         | 1         | 0         | 3          | 2          | 0          | 2          | 0         | 1         | 1         | 2         | 0         | 1         | 0         | 2                               |
| 68  | NCQRCNHKS<br>ACSATYVPC<br>VVLTEI                                              | 96               | 2          | 1         | 3         | 1         | 0         | 0         | 0         | 1         | 1         | 0          | 2          | 10         | 11         | 5         | 7         | 3         | 5         | 1         | 6         | 1         | 1                               |
| 69  | ECIGGGRGR<br>CSFVSPQSE<br>RGGVGDEK                                            | 26               | 0          | 1         | 2         | 0         | 0         | 1         | 0         | 0         | 1         | 7          | 2          | 3          | 0          | 0         | 1         | 3         | 1         | 0         | 1         | 3         | 0                               |
| 70  | CACFKKTEI<br>WFIR                                                             | 13               | 1          | 2         | 0         | 0         | 0         | 2         | 1         | 0         | 0         | 0          | 2          | 0          | 1          | 0         | 0         | 1         | 2         | 0         | 0         | 1         | 2                               |
| 71  | FGTCFIGRNT<br>TDGKV <sup>U</sup> RITW<br>YW <sup>U</sup>                      | 22               | 0          | 2         | 2         | 0         | 0         | 2         | 2         | 1         | 0         | 3          | 1          | 0          | 4          | 1         | 0         | 2         | 1         | 0         | 1         | 0         | 2                               |
| 72  | ACIDCFTRYG<br>TDEEVTLIDD<br>AGSANPQGE                                         | 20               | 1          | 2         | 1         | 1         | 0         | 1         | 0         | 1         | 0         | 1          | 2          | 0          | 3          | 0         | 0         | 1         | 0         | 0         | 4         | 2         | -5                              |
| SA1 | DPWCTWDY<br>PICINHK<br>GHGVTFYNP<br>CSTLIMTLKC<br>CTKMLA <sup>U</sup> CP<br>K | 24               | 2          | 2         | 0         | 0         | 0         | 0         | 2         | 1         | 3         | 2          | 2          | 1          | 1          | 2         | 1         | 0         | 1         | 1         | 2         | 1         | -2                              |
| 74  | GQAKQSIRV<br>CRRTLKS                                                          | 16               | 1          | 1         | 1         | 1         | 0         | 0         | 0         | 0         | 0         | 1          | 1          | 2          | 1          | 0         | 2         | 3         | 2         | 0         | 0         | 0         | 5                               |
| 76  | ESCPTYPICG<br>NMNFGCCTS<br>TGV                                                | 22               | 0          | 1         | 2         | 0         | 1         | 1         | 0         | 0         | 2         | 3          | 4          | 2          | 3          | 2         | 0         | 0         | 0         | 0         | 0         | 1         | -1                              |
| 77  | QFGSYCMCH<br>HKTLC <sup>U</sup> KNDS<br>VDL                                   | 21               | 0          | 0         | 1         | 2         | 1         | 1         | 0         | 1         | 0         | 1          | 3          | 2          | 1          | 1         | 1         | 0         | 2         | 2         | 2         | 0         | 0                               |
| 78  | ACPSTFTIDA<br>CAATGCNPK<br>DL                                                 | 22               | 4          | 1         | 0         | 1         | 0         | 1         | 0         | 0         | 2         | 1          | 2          | 2          | 0          | 0         | 1         | 2         | 2         | 0         | 1         | 0         | -1                              |
| SA3 | WCGNACTN<br>WKWSNGAG<br>TGC                                                   | 19               | 2          | 0         | 0         | 0         | 0         | 0         | 3         | 0         | 0         | 4          | 3          | 1          | 2          | 3         | 0         | 0         | 1         | 0         | 0         | 0         | 1                               |
|     | <b>Total of AA's</b>                                                          | <b>178<br/>3</b> | <b>102</b> | <b>75</b> | <b>80</b> | <b>94</b> | <b>18</b> | <b>56</b> | <b>57</b> | <b>66</b> | <b>86</b> | <b>178</b> | <b>178</b> | <b>131</b> | <b>149</b> | <b>82</b> | <b>55</b> | <b>66</b> | <b>87</b> | <b>25</b> | <b>89</b> | <b>59</b> | <b>Charge<sup>c</sup><br/>%</b> |

|                                                        |  |     |     |     |     |     |     |     |     |     |    |    |     |     |     |     |     |                              |     |     |     |                |    |
|--------------------------------------------------------|--|-----|-----|-----|-----|-----|-----|-----|-----|-----|----|----|-----|-----|-----|-----|-----|------------------------------|-----|-----|-----|----------------|----|
| Percentage %                                           |  | 5,9 | 4,3 | 4,6 | 5,4 | 1,0 | 3,2 | 3,3 | 3,8 | 4,9 | 10 | 10 | 7,6 | 8,6 | 4,7 | 3,2 | 3,8 | 5,0                          | 1,5 | 5,1 | 3,4 | -              | 43 |
| <b>Aminoacid presence in core peptides<sup>b</sup></b> |  | 55  | 50  | 48  | 49  | 16  | 42  | 36  | 45  | 43  | 64 | 76 | 66  | 59  | 50  | 30  | 40  | cor<br>rec<br>t<br>or<br>not | 23  | 50  | 40  | +              | 37 |
| Percentage %                                           |  | 70  | 63  | 61  | 62  | 20  | 54  | 46  | 57  | 54  | 81 | 96 | 84  | 75  | 63  | 38  | 51  | 65                           | 29  | 63  | 51  | N <sup>d</sup> | 20 |
|                                                        |  | A   | I   | V   | L   | M   | F   | W   | Y   | P   | G  | C  | S   | T   | N   | Q   | R   | K                            | H   | D   | E   |                |    |

87 <sup>a</sup> Total aminoacid per core sequence

88 <sup>b</sup> Count of times an amino acid is observed in SyncA's core.

89 <sup>c</sup> Summary of net charge<sup>2</sup> found in SyncA's. Percentage

90 <sup>d</sup> Neutral charge (N)

91

92

93

94

95

96

97

98

99



100 **Supplementary Table S2.** Summary of plasmids and strains used in this study. All the used plasmids were cloned into *L. lactis*  
 101 NZ9000.

| Strain                           | Mutations         | Characteristic                                                                                                          | References |
|----------------------------------|-------------------|-------------------------------------------------------------------------------------------------------------------------|------------|
| <i>Micrococcus flavus</i>        |                   | Sensitive strain                                                                                                        | 3          |
| <i>Lactococcus lactis</i> NZ9000 | <i>pepN:nisRK</i> | Nisin inducible strain used in cloning and peptides expression                                                          | 4          |
| pNZ-nisP, pIL253                 |                   | NisP soluble producer strain,<br>Cm <sup>R</sup> , Ery <sup>R</sup>                                                     | 3          |
| pNZe-NisP8H                      |                   | Ery <sup>R</sup> , Cm <sup>R</sup> . NisP producer strain                                                               | 3          |
| pTLR-SyncM                       |                   | SyncM lanthipeptide synthase cloned under nisin inducible promoter ( <i>P<sub>nis</sub></i> promoter), Ery <sup>R</sup> | 6          |
| pNZ8048                          |                   | Nisin inducible expression vector, Cm <sup>R</sup> ,                                                                    | 5          |
| pNZ8048-SyncA2                   |                   | SyncA2 cloned under <i>P<sub>nis</sub></i> promoter in pNZ8048<br>Cm <sup>R</sup>                                       | 6          |
| pNZ8048-SA2 -S12A                | S12A              | SA2 -S12A cloned under <i>P<sub>nis</sub></i> promoter, Cm <sup>R</sup>                                                 |            |
| pNZ8048-SA2-SWAP                 | Ring(C2S/S12C)    | SA2-SWAP cloned under <i>P<sub>nis</sub></i> promoter, Cm <sup>R</sup>                                                  | This work  |
| pNZ8048-SA2-+1A                  | +1A (P4_F5insA)   | under <i>P<sub>nis</sub></i> promoter, Cm <sup>R</sup>                                                                  | This work  |

|                          |                                                      |                                                                                                                                                               |           |
|--------------------------|------------------------------------------------------|---------------------------------------------------------------------------------------------------------------------------------------------------------------|-----------|
| pNZ8048- SA2-+2A         | +2A (P4_F5insAA)                                     | under $P_{nis}$ promoter, Cm <sup>R</sup>                                                                                                                     | This work |
| pNZ8048- SA2-+3A         | +3A (P4_F5insAAA)                                    | under $P_{nis}$ promoter, Cm <sup>R</sup>                                                                                                                     | This work |
| pNZ8048- SA2-+4A         | +4A (P4_F5insAAAA)                                   | under $P_{nis}$ promoter, Cm <sup>R</sup>                                                                                                                     | This work |
| pNZ8048-SyncA6           |                                                      | SyncA6 cloned under under $P_{nis}$ promoter, Cm <sup>R</sup>                                                                                                 | 5         |
| pNZ8048-SyncA6- SA6-SC   | Ring1(C2S/S15C)-Ring2( S3C /C14S)                    | SA6-SC cloned under $P_{nis}$ promoter, Cm <sup>R</sup>                                                                                                       | This work |
| pNZ8048-SyncA6- SA6-AS   | $\Delta$ Ring1(C2A/S15A)                             | SA6-AS cloned under $P_{nis}$ promoter, Cm <sup>R</sup>                                                                                                       | This work |
| pNZ8048-SyncA6- SA6-AC   | $\Delta$ Ring1 (C2A/S15A)-<br>Ring2(S2C /C14S)       | SA6-AC cloned under $P_{nis}$ promoter Cm <sup>R</sup>                                                                                                        | This work |
| pNZ8048-SyncA6- SA6-CA   | $\Delta$ Ring2(S2A/C14S)                             | SA6-CA cloned under $P_{nis}$ promoter Cm <sup>R</sup>                                                                                                        | This work |
| pNZ8048-SyncA6- SA6-SA   | Ring1(C2S/S15) -<br>$\Delta$ Ring2(S2A/C14S)         | SA6-SA cloned under $P_{nis}$ promoter Cm <sup>R</sup>                                                                                                        | This work |
| pNZ8048-SyncA2LE- SA2.1  | F5K                                                  | SA2.1 cloned after SA2- LEADER -ASPR<br>under $P_{nis}$ promoter, Cm <sup>R</sup>                                                                             | This work |
| pNZ8048-SyncA2LE- SA2.2  | F5K_D9K                                              | SA2.2 cloned after SA2- LEADER -ASPR<br>under $P_{nis}$ promoter, Cm <sup>R</sup>                                                                             | This work |
| pNZ8048-SyncA2LE- SA-2.3 | F5W_Y8W_D9R_L13R_L14R-<br>$\Delta$ S15- $\Delta$ P16 | SA-2.3 cloned after SA2-LEADER-ASPR<br>under $P_{nis}$ promoter, Cm <sup>R</sup>                                                                              | This work |
| pNZ8048-SyncA2LE- SA-2.4 | Most of the structure change                         | SA-2.4 cloned after SA2- LEADER -ASPR<br>pNZ8048, under $P_{nis}$ promoter, Cm <sup>R</sup>                                                                   | This work |
| pNZ8048-SyncA2LE- SA-2.5 | Most of the structure change                         | SA-2.5 cloned after SA2-LEADER ASPR<br>pNZ8048, under $P_{nis}$ promoter, Cm <sup>R</sup>                                                                     | This work |
| pNZ8048-SyncA2LE- SAUW.1 | Q1R_N7R                                              | SAUW.1 cloned after SA2- LEADER -ASPR<br>under $P_{nis}$ promoter, Cm <sup>R</sup>                                                                            | This work |
| pNZ8048-LACM             | insS15 <sup>7</sup>                                  | LACM cloned after SA2- LEADER -ASPR<br>pNZ8048, under $P_{nis}$ promoter, Cm <sup>R</sup><br>Ery <sup>R</sup> , syncM cloned in pTLR under $P_{nis}$ promoter | This work |

|                                         |                                                      |                                                                                                                                                                                             |           |
|-----------------------------------------|------------------------------------------------------|---------------------------------------------------------------------------------------------------------------------------------------------------------------------------------------------|-----------|
| pNZ8048- LACPINM                        | S16C <sup>7</sup>                                    | LACPINM cloned after SA2- LEADER -ASPR<br>pNZ8048, under $P_{nis}$ promoter, Cm <sup>R</sup>                                                                                                | This work |
| pNZ8048- -BACM                          | C3S <sup>8</sup>                                     | BACM cloned after SA2- LEADER -ASPR<br>pNZ8048, under $P_{nis}$ promoter, Cm <sup>R</sup>                                                                                                   | This work |
| pNZ8048 - SUB3M                         | insS3_insC14 <sup>9</sup>                            | SUB3M cloned after SA2- LEADER -ASPR<br>pNZ8048, under $P_{nis}$ promoter, Cm <sup>R</sup>                                                                                                  | This work |
| pNZ8048 - M1M                           | Murepavadin mimic <sup>1</sup>                       | M1M cloned after SA2- LEADER -ASPR<br>pNZ8048, under $P_{nis}$ promoter, Cm <sup>R</sup>                                                                                                    | This work |
| pNZ8048 - M2M                           | Murepavadin mimic                                    | M2M cloned after SA2- LEADER -ASPR<br>pNZ8048, under $P_{nis}$ promoter, Cm <sup>R</sup>                                                                                                    | This work |
| pNZ8048-SyncA7                          |                                                      | under $P_{nis}$ promoter Cm <sup>R</sup>                                                                                                                                                    | 6         |
| pNZ8048-SyncA7LE-<br>SyncA7.1           | D5K_D8K                                              | Desired core peptide was cloned after SA7-<br>LEADER GG<br>pNZ8048, under $P_{nis}$ promoter, Cm <sup>R</sup><br>Ery <sup>R</sup> , <i>syncM</i> cloned in pTLR under $P_{nis}$ promoter    | This work |
| pNZ8048-SyncA7LE-<br>SyncA7.2           | -Y1R_G2R_D5R_D8R_Y12R                                | Desired core peptide was cloned after SA7-LE<br>LEADER GG<br>pNZ8048, under $P_{nis}$ promoter, Cm <sup>R</sup><br>Ery <sup>R</sup> , <i>syncM</i> cloned in pTLR under $P_{nis}$ promoter  | This work |
| pNZ8048-SyncA2LE- SA2.2,<br>pTLR-SyncM  | F5K_D9K                                              | Desired core peptide was cloned after SA2-<br>LEADER -ASPR<br>pNZ8048, under $P_{nis}$ promoter, Cm <sup>R</sup><br>Ery <sup>R</sup> , <i>syncM</i> cloned in pTLR under $P_{nis}$ promoter | This work |
| pNZ8048-SyncA2LE- SA-2.3,<br>pTLR-SyncM | F5W_Y8W_D9R_L13R_L14R-<br>$\Delta$ S15- $\Delta$ P16 | Desired core peptide was cloned after SA2-<br>LEADER-ASPR<br>pNZ8048, under $P_{nis}$ promoter, Cm <sup>R</sup><br>Ery <sup>R</sup> , <i>syncM</i> cloned in pTLR under $P_{nis}$ promoter  | This work |
| pNZ8048-SyncA2LE- SA-2.4,<br>pTLR-SyncM | Most of the structure change                         | Desired core peptide was cloned after SA2-<br>LEADER -ASPR<br>pNZ8048, under $P_{nis}$ promoter, Cm <sup>R</sup><br>Ery <sup>R</sup> , <i>syncM</i> cloned in pTLR under $P_{nis}$ promoter | This work |

|                                         |                                |                                                                                                                                                                       |           |
|-----------------------------------------|--------------------------------|-----------------------------------------------------------------------------------------------------------------------------------------------------------------------|-----------|
| pNZ8048-SyncA2LE- SA-2.5,<br>pTLR-SyncM | Most of the structure change   | Desired core peptide was cloned after SA2-LEADER ASPR<br>pNZ8048, under $P_{nis}$ promoter, $Cm^R$<br>$Ery^R$ , <i>syncM</i> cloned in pTLR under $P_{nis}$ promoter  | This work |
| pNZ8048-SyncA2LE-<br>SAUW.1, pTLR-SyncM | -Q1R_N7R                       | Desired core peptide was cloned after SA2-LEADER -ASPR<br>pNZ8048, under $P_{nis}$ promoter, $Cm^R$<br>$Ery^R$ , <i>syncM</i> cloned in pTLR under $P_{nis}$ promoter | This work |
| pNZ8048-LACM_, pTLR-<br>SyncM           | _+S15 <sup>7</sup>             | Desired core peptide was cloned after SA2-LEADER -ASPR<br>pNZ8048, under $P_{nis}$ promoter, $Cm^R$<br>$Ery^R$ , <i>syncM</i> cloned in pTLR under $P_{nis}$ promoter | This work |
| pNZ8048- LACPINM, pTLR-<br>SyncM        | S16C <sup>7</sup>              | Desired core peptide was cloned after SA2-LEADER -ASPR<br>pNZ8048, under $P_{nis}$ promoter, $Cm^R$<br>$Ery^R$ , <i>syncM</i> cloned in pTLR under $P_{nis}$ promoter | This work |
| pNZ8048- -BACM, pTLR-<br>SyncM          | C3S <sup>8</sup>               | Desired core peptide was cloned after SA2-LEADER -ASPR<br>pNZ8048, under $P_{nis}$ promoter, $Cm^R$<br>$Ery^R$ , <i>syncM</i> cloned in pTLR under $P_{nis}$ promoter | This work |
| pNZ8048-SUB3M, pTLR-<br>SyncM           | +S3+C14 <sup>9</sup>           | Desired core peptide was cloned after SA2-LEADER -ASPR<br>pNZ8048, under $P_{nis}$ promoter, $Cm^R$<br>$Ery^R$ , <i>syncM</i> cloned in pTLR under $P_{nis}$ promoter | This work |
| pNZ8048- M1M, pTLR-SyncM                | Murepavadin mimic <sup>1</sup> | Desired core peptide was cloned after SA2-LEADER -ASPR<br>pNZ8048, under $P_{nis}$ promoter, $Cm^R$<br>$Ery^R$ , <i>syncM</i> cloned in pTLR under $P_{nis}$ promoter | This work |
| pNZ8048 - M2M, pTLR-<br>SyncM           | Murepavadin mimic              | Desired core peptide was cloned after SA2-LEADER -ASPR<br>pNZ8048, under $P_{nis}$ promoter, $Cm^R$<br>$Ery^R$ , <i>syncM</i> cloned in pTLR under $P_{nis}$ promoter | This work |

|                           |                       |                                                                                                                                                                                             |           |
|---------------------------|-----------------------|---------------------------------------------------------------------------------------------------------------------------------------------------------------------------------------------|-----------|
| pNZ8048-SyncA7            |                       | under P <sub>nis</sub> promoter Cm <sup>R</sup>                                                                                                                                             | 6         |
| pNZ8048-SyncA7LE-SyncA7.1 | -D5K_D8K              | Desired core peptide was cloned after SA7-LEADER GG<br>pNZ8048, under P <sub>nis</sub> promoter, Cm <sup>R</sup><br>Ery <sup>R</sup> , syncM cloned in pTLR under P <sub>nis</sub> promoter | This work |
| pNZ8048-SyncA7LE-SyncA7.2 | -Y1R_G2R_D5R_D8R_Y12R | Desired core peptide was cloned after SA7-LEADER GG<br>pNZ8048, under P <sub>nis</sub> promoter, Cm <sup>R</sup><br>Ery <sup>R</sup> , syncM cloned in pTLR under P <sub>nis</sub> promoter | This work |

102

103 **Reference**

- 104 (1) McLaughlin, M. I., and van der Donk, W. A. (2020) The Fellowship of the Rings:  
105 Macrocytic Antibiotic Peptides Reveal an Anti-Gram-Negative Target,  
106 *Biochemistry* 59, 343-345.
- 107 (2) Wang, G., Li, X., and Wang, Z. (2016) APD3: the antimicrobial peptide database  
108 as a tool for research and education, *Nucleic Acids Res* 44, D1087-1093.
- 109 (3) Montalban-Lopez, M., Deng, J., van Heel, A. J., and Kuipers, O. P. (2018)  
110 Specificity and Application of the Lantibiotic Protease NisP, *Front Microbiol* 9,  
111 160.
- 112 (4) Kuipers, O. P., de Ruyter, P. G., Kleerebezem, M., and de Vos, W. M. (1997)  
113 Controlled overproduction of proteins by lactic acid bacteria, *Trends Biotechnol*  
114 15, 135-140.
- 115 (5) Kuipers, O. P., de Ruyter, P. G. G. A., Kleerebezem, M., and de Vos, W. M. (1998)  
116 Quorum sensing-controlled gene expression in lactic acid bacteria, *Journal of*  
117 *Biotechnology* 64, 15-21.
- 118 (6) Arias-Orozco, P., Inklaar, M., Lanooij, J., Cebrian, R., and Kuipers, O. P. (2021)  
119 Functional Expression and Characterization of the Highly Promiscuous  
120 Lanthipeptide Synthetase SyncM, Enabling the Production of Lanthipeptides  
121 with a Broad Range of Ring Topologies, *ACS Synth Biol* 10, 2579-2591.
- 122 (7) van der Kraan, M. I. A., Groenink, J., Nazmi, K., Veerman, E. C. I., Bolscher, J. G.  
123 M., and Nieuw Amerongen, A. V. (2004) Lactoferrampin: a novel antimicrobial  
124 peptide in the N1-domain of bovine lactoferrin, *Peptides* 25, 177-183.
- 125 (8) Wu, M., and Hancock, R. E. W. (1999) Improved Derivatives of Bactenecin, a Cyclic  
126 Dodecameric Antimicrobial Cationic Peptide, *Antimicrobial Agents and*  
127 *Chemotherapy* 43, 1274-1276.

128 (9) Hilpert, K., Volkmer-Engert, R., Walter, T., and Hancock, R. E. (2005) High-  
129 throughput generation of small antibacterial peptides with improved activity, *Nat*  
130 *Biotechnol* 23, 1008-1012.

131

132
